# Supplementary material for: Transition metal complex-incorporated polyaniline as a platform for an enzymatic uric acid electrochemical sensor
Source: Royal Society of Chemistry journal article supplement (doi:10.1039/d3an00014a), 2023-01-01
Supplement: d3an00014a1.pdf [file d3an00014a1.pdf]

**Electronic Supplementary Information for**

**Transition metal complex-incorporated polyaniline as a platform for  
enzymatic uric acid electrochemical sensor**

**Ruth Stephanie,<sup>‡</sup> Dae Yeon Lee,<sup>‡</sup> Chan Yeong Park\*, and Tae Jung Park\***

*Department of Chemistry, Research Institute of Chem-Bio Diagnostic Technology, Chung-  
Ang University, 84 Heukseok-ro, Dongjak-gu, Seoul 06974, Republic of Korea*

\*Corresponding author. Tel.: +82-2-820-5220; fax: +82-2-825-4736.

*E-mail address:* pcyzzing@naver.com (C.Y. Park); tjpark@cau.ac.kr (T.J. Park)

<sup>‡</sup>These authors equally contributed to this work.

## Electrochemical surface area comparison between PANI-RC and PANI-RC/EM/GA

The active surface area of the samples is determined using Randles-Sevcik equation according to Equation S1. The CV was carried out with 5 mM  $[\text{Fe}(\text{CN})_6]^{3-/4-}$  in 0.1 M KCl at the scan rate of 50 mV/s.

$$I_p = 2.69 \times 10^5 \times A \times C \times D^{1/2} \times n^{3/2} \times v^{1/2} \quad (\text{Equation S1})$$

with:

$I_p$  = Current peak from CV (A)

$A$  = Surface area ( $\text{cm}^2$ )

$C$  = Concentration of analyte ( $\text{mol}/\text{cm}^3$ )

$D$  = Diffusion coefficient ( $\text{cm}^2/\text{s}$ )

$n$  = number of electrons participating in the reaction (In our case,  $n = 1$ )

$v$  = Scan rate (V/s)

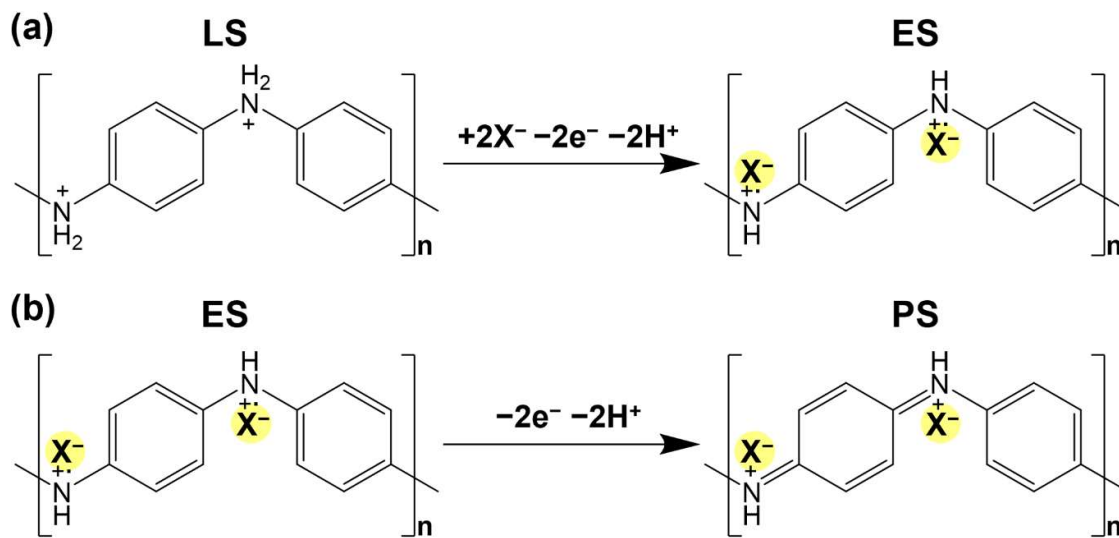

**Figure S1.** Mechanism of PANI (and PANI-RC) polymerization, involving three oxidation states. Transition from (a) LS to ES and (b) ES to PS. The highlighted yellow part is where  $[Fe(CN)_6]^{3-/4-}$  are positioned on the backbone of PANI (\*Note: LS: leucoemeraldine salt, ES: emeraldine salt, PS: pernigraniline salt).

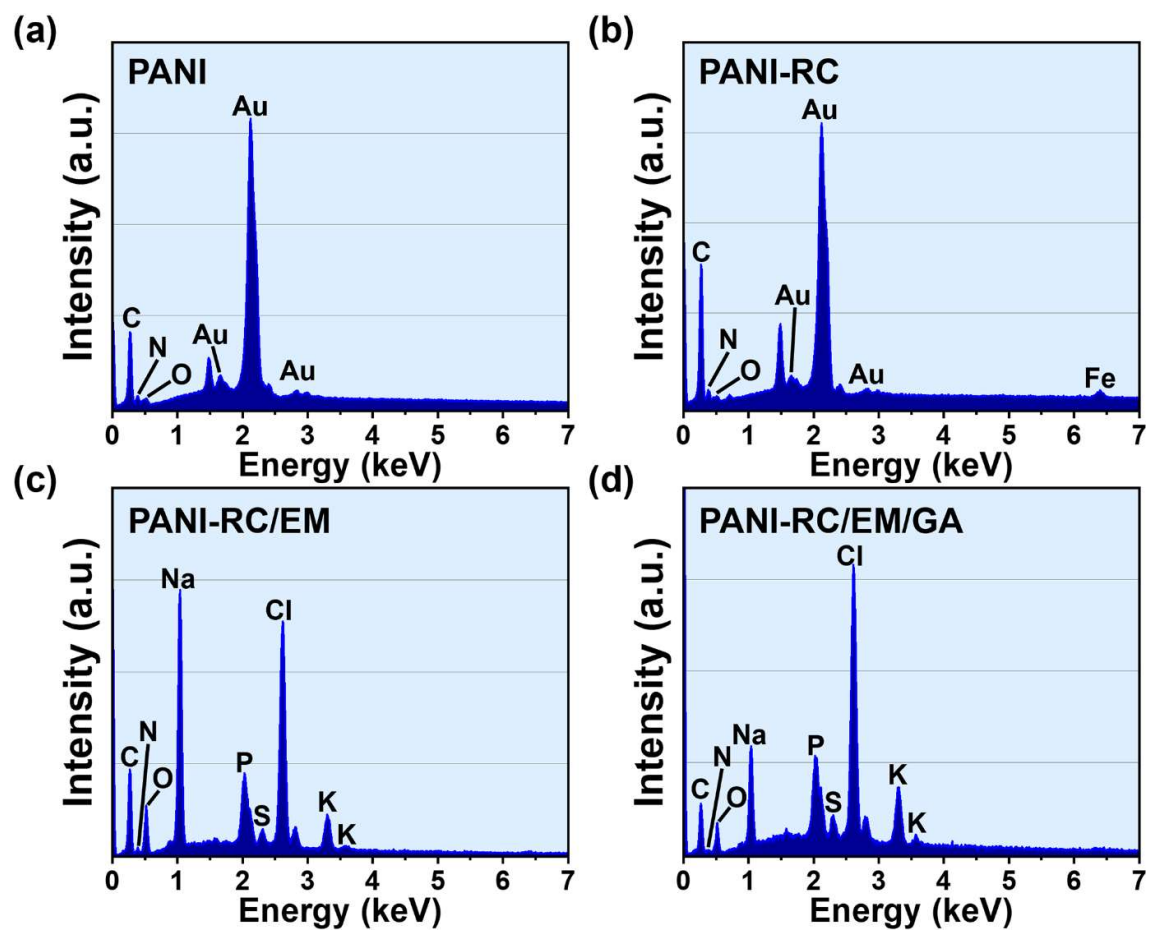

**Figure S2.** EDS spectra of (a) PANI, (b) PANI-RC, (c) PANI-RC/EM, and (d) PANI-RC/EM/GA.

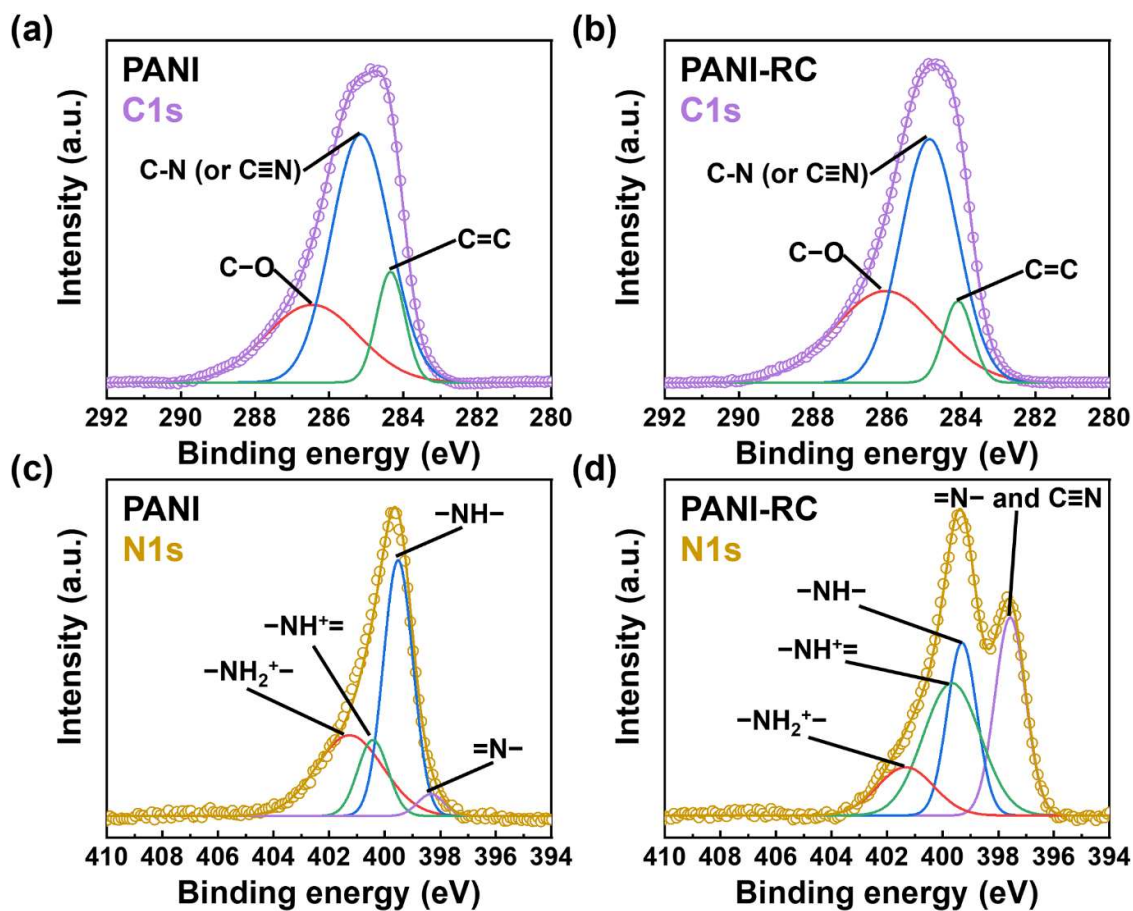

**Figure S3.** Narrow range XPS spectra of PANI and PANI-RC. C1s region of (a) PANI and (b) PANI-RC. N1s region of (c) PANI and (d) PANI-RC.

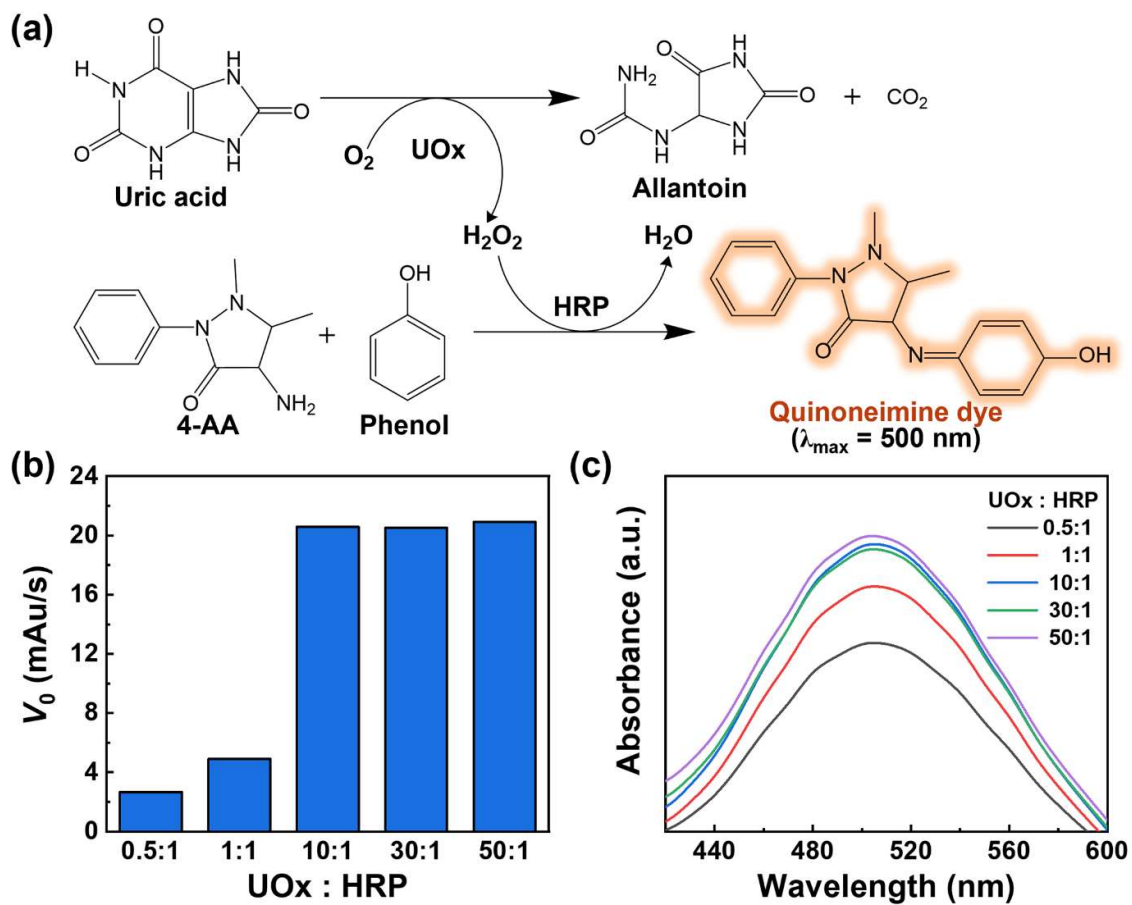

**Figure S4.** (a) Mechanism of 4-AA method. (b) UOx : HRP ratio optimization. (c) Absorbance spectra.

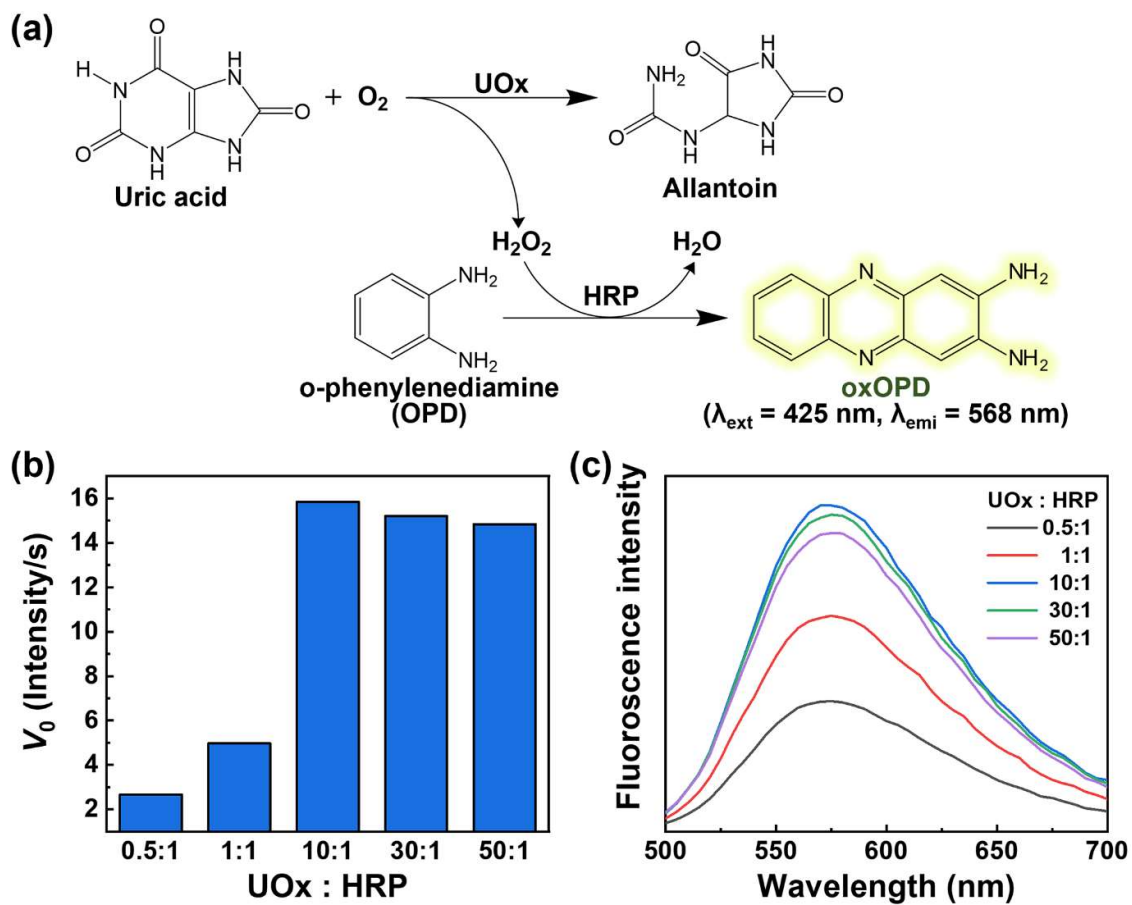

**Figure S5.** (a) Mechanism of OPD method. (b) UOx : HRP ratio optimization. (c) Fluorescence spectra.

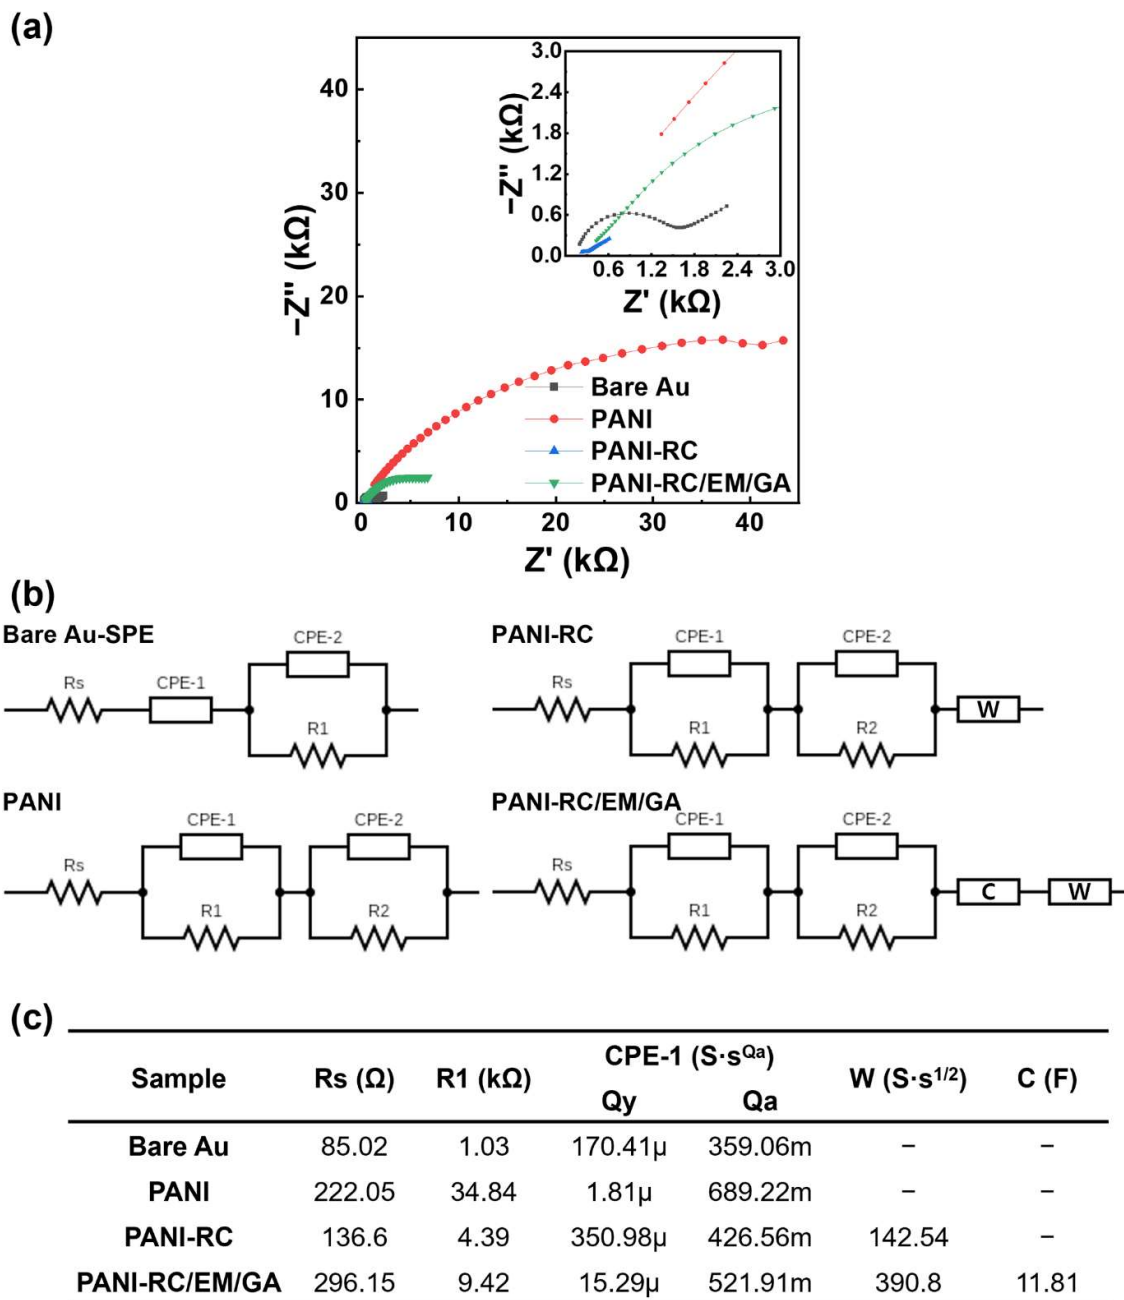

**Figure S6.** (a) Nyquist plot of each synthesis step in the making of PANI-RC/EM/GA, and (b) the respective equivalent circuits. (c) The change of impedance elements recorded from the EIS of each synthesis step in the making of PANI-RC/EM/GA.



**Table S1.** FT-IR peak assignments observed in FT-IR spectrum

| <b>Material</b>      | <b>Assignments</b>                                                                       | <b>Chemical bonding</b>                     | <b>Wavenumber (cm<sup>-1</sup>)</b> |
|----------------------|------------------------------------------------------------------------------------------|---------------------------------------------|-------------------------------------|
| <b>PANI</b>          | Quinonoid (Q) ring stretching                                                            | N=Q=N                                       | 1563                                |
|                      | Benzenoid (B) ring stretching                                                            | N-B-N                                       | 1484                                |
|                      | C-N stretching of secondary aromatic amine                                               | C-N                                         | 1295                                |
|                      | C-N <sup>+</sup> in the polaron lattice of PANI                                          | C-N <sup>+</sup>                            | 1241                                |
|                      | Q=NH <sup>+</sup> -B or B-NH <sup>+</sup> -B (1,4-disubstituted ring)/Q ring deformation | C-H                                         | 1140                                |
| <b>PANI-RC</b>       | C≡N stretching vibrational peak                                                          | C≡N                                         | 2045                                |
|                      | N-H stretching vibration of secondary amine                                              | N-H                                         | 3417                                |
|                      | O-H stretching vibrations                                                                | -OH                                         | 3067                                |
| <b>PANI-RC/EM</b>    | C-H stretching of alkane                                                                 | -CH, -CH <sub>2</sub> ,<br>-CH <sub>3</sub> | 2963, 2872                          |
|                      | C=O stretching vibrations of amide I                                                     | C=O                                         | 1652                                |
| <b>PANI-RC/EM/GA</b> | -CH <sub>2</sub> scissoring vibrations                                                   | -CH <sub>2</sub>                            | 1401                                |
|                      | C-O stretching vibrations of aldehydes                                                   | C-O                                         | 1711                                |

**Table S2.** Raman peak assignments comparison between PANI and PANI-RC

| Structure                                                                         | Raman shift peak (cm <sup>-1</sup> ) |            |
|-----------------------------------------------------------------------------------|--------------------------------------|------------|
|                                                                                   | PANI                                 | PANI-RC    |
| Aromatic ring                                                                     | 417, 518                             | 424, 522   |
| C-H bending vibrations of the semiquinone rings                                   | 1171                                 | 1171       |
| C-N benzenoid                                                                     | 1171                                 | 1171       |
| Localized and delocalized polarons (C-N <sup>+</sup> polaronic form)              | 1340, 1377                           | 1340, 1374 |
| C=N quinoid (N-H deformation vibration associated with the semiquinone structure) | 1505                                 | 1505       |
| C=C quinoid (C=C stretches vibration in quinoid ring)                             | 1587                                 | 1600       |
